# Supplementary material for: Enhancing the assessment of Cleaner Production Practices for Sustainable Development: The Five Sectors Sustainability Model Applied to Water and Wastewater Treatment Companies
Source: Preprints.org preprint supplement (doi:10.20944/preprints202201.0334.v1), 2022-01-24
Supplement: Supplementary file 3 [file supplementary]

## Sheet: Plan1
Código do Município	Município	Estado	Perda/m3	Lucro/m3 (USD$/m3)	Empregados/m3	Salario Medio anual	Valor Agregado Bruto (VAB/m3) = (FN002+FN003-FN011-FN013-FN014-FN020 (R$))/(AG011+ES007)) (R$/m3)	Índice de Gasto de Salários/VAB	Ano de Referência	Código do Prestador	Prestador	Sigla do Prestador	Abrangência	Tipo de Serviço	Natureza Jurídica	G05A - Quantidade total de municípios atendidos com abastecimento de água (Municípios)	G05B - Quantidade total de municípios atendidos com esgotamento sanitário (Municípios)	G06A - População urbana residente do(s) município(s) com abastecimento de água (Habitantes)	G06B - População urbana residente do(s) município(s) com esgotamento sanitário (Habitantes)	G12A - População total residente do(s) município(s) com abastecimento de água, segundo o IBGE (Habitantes)	G12B - População total residente do(s) município(s) com esgotamento sanitário, segundo o IBGE (Habitantes)	GE001 - Quantidade de municípios atendidos com abastecimento de água com delegação em vigor (Municípios)	GE002 - Quantidade de municípios atendidos com abastecimento de água com delegação vencida (Municípios)	GE003 - Quantidade de municípios atendidos com abastecimento de água sem delegação (Municípios)	GE005 - Quantidade total de municípios atendidos (Municípios)	GE008 - Quantidade de Sedes municipais atendidas com abastecimento de água (Sedes)	GE009 - Quantidade de Sedes municipais atendidas com esgotamento sanitário (Sedes)	GE010 - Quantidade de Localidades (excluídas as sedes) atendidas com abastecimento de água (Localidades)	GE011 - Quantidade de Localidades (excluídas as sedes) atendidas com esgotamento sanitário (Localidades)	GE014 - Quantidade de municípios atendidos com esgotamento sanitário com delegação em vigor (Municípios)	GE015 - Quantidade de municípios atendidos com esgotamento sanitário com delegação vencida (Municípios)	GE016 - Quantidade de municípios atendidos com esgotamento sanitário sem delegação (Municípios)	GE017 - Ano de vencimento da delegação de abastecimento de água (Ano)	GE018 - Ano de vencimento da delegação de esgotamento sanitário (Ano)	GE025 - Quantidade de municípios não atendidos com abastecimento de água, mas com delegação em vigor (Municípios)	GE026 - Quantidade de municípios não atendidos com abastecimento de água, mas com delegação vencida para prestar esses serviços (Municípios)	GE028 - Quantidade de municípios não atendidos com esgotamento sanitário, mas com delegação em vigor para prestar esses serviços (Municípios)	GE029 - Quantidade de municípios não atendidos com esgotamento sanitário, mas com delegação vencida para prestar esses serviços (Municípios)	AG001 - População total atendida com abastecimento de água (Habitantes)	AG001A - População total atendida com abastecimento de água no ano anterior ao de referência. (habitante)	AG002 - Quantidade de ligações ativas de água (Ligações)	AG002A - Quantidade de ligações ativas de água no ano anterior ao de referência. (ligação)	AG003 - Quantidade de economias ativas de água (Economias)	AG003A - Quantidade de economias ativas de água no ano anterior ao de referência. (economia)	AG004 - Quantidade de ligações ativas de água micromedidas (Ligações)	AG004A - Quantidade de ligações ativas de água micromedidas no ano anterior ao de referência. (ligação)	AG005 - Extensão da rede de água (km)	AG005A - Extensão da rede de água no ano anterior ao de referência. (km)	AG006 - Volume de água produzido (1.000 m³/ano)
221100	Teresina	PI	0.5172	-0.235331	11.492	0.000440804	0.56381	2.87432	2014	22110000	Águas e Esgotos do Piauí S/A	AGESPISA	Regional	Água e Esgoto	Sociedade de economia mista com administração pública	155	6	1952368	1060346	2811388	1168159	92	51	12	155	155	6	22	0	5	1	0			0	0	0	0	1890680	1867380	627956	612570	672728	647739	597695	575345	5078.45	5092.01	201337
211130	São Luís	MA	0.622	-0.0613222	15.4257	0.000280891	0.608634	2.53304	2014	21113000	Companhia de Saneamento Ambiental do Maranhão	CAEMA	Regional	Água e Esgoto	Sociedade de economia mista com administração pública	141	3	3128332	1268190	4768125	1376140	91	35	15	141	139	3	32	0	1	1	1			13	0	86	0	2238446	2310290	546493	568479	625293	646920	124127	129504	5918.01	10360.9	295184
240810	Natal	RN	0.5582	0.0118883	13.8369	0.000172831	0.799314	1.22612	2014	24081000	Companhia de Águas e Esgotos do Rio Grande do Norte	CAERN	Regional	Água e Esgoto	Sociedade de economia mista com administração pública	154	42	2429972	1842145	3072648	2090819	103	37	11	154	152	41	12	1	33	6	2			2	1	72	32	2523284	2474862	682970	657333	793492	772161	558824	501890	6003.05	5930.81	234015
530010	Brasília	DF	0.271	0.0109518	7.54205	0.000291992	1.23996	1.58698	2014	53001000	Companhia de Saneamento Ambiental do Distrito Federal	CAESB	Regional	Água e Esgoto	Sociedade de economia mista com administração pública	1	1	2754765	2754765	2852372	2852372	1	0	0	1	1	1	1	1	1	0	0			0	0	0	0	2779922	2739545	615776	616298	969306	958393	611197	615413	9072.85	8978	251115
230440	Fortaleza	CE	0.4241	-0.2613	4.61328	0.000147004	0.579558	1.12706	2014	23044000	Companhia de Água e Esgoto do Ceará	CAGECE	Regional	Água e Esgoto	Sociedade de economia mista com administração pública	151	73	5862595	4924981	7516665	5884120	143	7	1	151	151	73	56	9	68	4	1			0	0	74	3	4479210	4926880	1567671	1524259	1782006	1730550	1566580	1523075	12651.1	12303	387128
250750	João Pessoa	PB	0.3875	-0.0226528	17.4677	0.000174452	0.869891	1.72224	2014	25075000	Companhia de Águas e Esgotos da Paraíba	CAGEPA	Regional	Água e Esgoto	Sociedade de economia mista com administração pública	194	21	2776732	1864132	3578960	2047549	58	115	21	194	194	21	24	0	7	14	0			2	8	51	102	2874018	2760879	810480	790267	912806	871089	711520	689183	4809.27	4654.49	224126
270430	Maceió	AL	0.448	0	14.7128	0.000456058	0.588548	2.40355	2014	27043000	Companhia de Saneamento de Alagoas	CASAL	Regional	Água e Esgoto	Sociedade de economia mista com administração pública	76	9	1960988	1157776	2631815	1233948	40	27	9	76	75	9	678	3	6	2	0			0	0	34	25	1926543	1862962	393141	382799	454246	441510	355636	346426	4971.6	4906.42	152163
420540	Florianópolis	SC	0.3974	0.134175	11.6699	0.000193026	1.10853	1.13183	2014	42054000	Companhia Catarinense de Águas e Saneamento	CASAN	Regional	Água e Esgoto	Sociedade de economia mista com administração pública	199	16	2659809	1215106	3342719	1302687	178	15	5	199	197	16	125	7	15	1	0			0	0	166	14	2702417	2601298	750656	725644	1059274	1004562	747327	721988	13167	12841.8	251928
330455	Rio de Janeiro	RJ	0.3055	0.145834	5.43322	4.04528e-05	1.22658	0.565596	2014	33045500	Companhia Estadual de Águas e Esgotos	CEDAE	Regional	Água e Esgoto	Sociedade de economia mista com administração pública	63	29	13112006	11883488	13443626	12034562	55	8	0	63	61	29	74	0	22	3	4			1	0	5	1	11617039	11549965	2247329	2258002	4152586	4126259	1367191	1346178	21895.6	21839.5	1856211
320530	Vitória	ES	0.3301	0.150141	5.92522	0.000158869	0.706574	0.893846	2014	32053000	Companhia Espírito-Santense de Saneamento	CESAN	Regional	Água e Esgoto	Sociedade de economia mista com administração pública	52	26	2369378	2142957	2753255	2338013	47	5	0	52	52	23	43	16	23	3	0			0	0	14	3	2138624	2130700	562138	551132	865306	843194	533875	522046	8107.98	7252.35	252333
	Menor X(i)		0.271	-0.2613	4.61328	4.04528e-05
	Mayor X(i)		0.622	0.150141	17.4677	0.000456058
	Media X(i)		0.4261	-0.0127615	10.8119	0.000235638
	Distribución Beta
			Tasa Actual (Real/Dólar)	2.6
[truncated: 206 more columns]

## Sheet: Calculation
SYSTEM		ENVIRONMENT AS PROVIDER ( Sector 1)									ENVIRONMENT AS RECEIVER (Sector 2)									PRODUCTION SYSTEM (Sector 3)									SOCIETY AS PROVIDER (Sector 4)									SOCIETY AS RECEIVER (Sector 5)
Index	WWT Companies	K11- Loss (m³)	Nij (K11)	Pij (K11)	IPM (K11)	K12 - Consumption of water extracted from source/Population attended (m³/person)	Nij (K12)	Pij (K12)	IPM (K12)	∑(Ind. Sector 1)	K21 - CO2 sewage emission eq/year Treated and non Treated Sewage = Emissions by Electricity, Treated Sewage + BOD Emission by Treated Sewage + BOD Emission by Non Treated Sewage (tCO2/m3 year)	Nij (K21)	Pij (K21)	IPM (K21)	K22 - CO2 emission treated water only electricity (tCO2/m³ year)	Nij (K22)	Pij (K22)	IPM (K22)	∑(Ind. Sector 2)	K31 - Profit (USD/m³)	Nij (K31)	Pij (K31)	IPM (K31)	K32 - Gross Value Added (GVA/m3) = (FN002+FN003-FN011-FN013-FN014-FN020 (R$))/(AG011+ES007)) (USD/m³)	Nij (K32)	Pij (K32)	IPM (K32)	∑(Ind. Sector 3)	K41 - Labor use Employee/Mm³	Nij (K41)	Pij (K41)	IPM (K41)	K42 - Salaries Index/GVA	Nij (K42)	Pij (K42)	IPM (K42)	∑(Ind. Sector 4)	K51 - Water consumption per capita (m³/person day)	Nij (K51)	Pij (K51)	IPM (K51)	K52 - Relation between treated and invoiced Sewage (%)	Nij (K52)	Pij (K52)	IPM (K52)	∑(Ind. Sector 5)	∑(IPM)
1	AGESPISA	0.5172	0	0.137784	1.81574	0.103124	0	0.0417955	3.40749	5.22322	3.91863	0.0137473	0	3.49593e-05	0.158597	0.00619859	0	0.000376138	0.000411098	-0.177351	0.32555	0	10.9835	0.4249	0.518659	0	2.74842	13.7319	11.492	3.17882	0	1.08339	1.10551	0	0.239521	0.00276587	1.08615	159.731	0	49.7309	0.00452099	0.714802	0.778336	0	2.60638	2.6109	22.6526
2	CAEMA	0.622	0	0.242584	3.19681	0.0943581	0	0.0330292	2.69279	5.8896	3.74011	0.192275	0	0.000488954	0.227693	0	0.0628973	1.90834	1.90883	-0.0462138	0.194413	0	6.55918	0.458681	0.484879	0	2.56941	9.12859	15.4257	0	0.75491	0.000514567	0.974247	0	0.10826	0.00125013	0.0017647	125.343	0	15.3432	0.00139483	0.381852	1.11129	0	3.72131	3.7227	20.6515
3	CAERN	0.5582	0	0.178784	2.35604	0.0963038	0	0.0349749	2.85142	5.20746	4.39183	0	0.459448	0.584186	0.238249	0	0.0734535	2.22862	2.81281	0.00895926	0.13924	0	4.69773	0.602381	0.341178	0	1.80793	6.50566	13.8369	0.833843	0	0.284185	0.471586	0.394402	0	2.27718	2.56137	136.986	0	26.986	0.00245327	0.62159	0.871549	0	2.91851	2.92097	20.0083
4	CAESB	0.271	0.108416	0	0.00285745	0.0911566	0	0.0298277	2.43178	2.43464	3.32777	0.604615	0	0.00153753	0.171313	0	0.00651757	0.197747	0.199285	0.00825355	0.139946	0	4.72154	0.934464	0.00909582	0	0.0481995	4.76974	7.54205	7.12872	0	2.42957	0.610376	0.255612	0	1.47584	3.90541	184.416	0	74.4163	0.00676512	0.819873	0.673265	0	2.25453	2.26129	13.5704
5	CAGECE	0.4241	0	0.0446839	0.588851	0.0660336	0	0.00470472	0.383565	0.972416	4.04901	0	0.11663	0.148295	0.0975756	0.0672199	0	0.00407899	0.152374	-0.196922	0.345121	0	11.6438	0.436769	0.506791	0	2.68553	14.3293	4.61328	10.0575	0	3.42773	0.433486	0.432502	0	2.49716	5.92489	169.589	0	59.5893	0.00541721	0.862406	0.630732	0	2.1121	2.11752	23.4965
6	CAGEPA	0.3875	0	0.00808389	0.106531	0.0807158	0	0.0193869	1.58057	1.6871	4.30918	0	0.376799	0.479098	0.209884	0	0.0450885	1.36801	1.84711	-0.0170717	0.165271	0	5.57597	0.65557	0.28799	0	1.52608	7.10205	17.4677	0	2.79692	0.00190645	0.662399	0.203589	0	1.17547	1.17738	130.009	0	20.0085	0.00181896	1.08022	0.412916	0	1.38271	1.38453	13.1982
7	CASAL	0.448	0	0.0685839	0.903808	0.0775952	0	0.0162663	1.32615	2.22996	6.7314	0	2.79902	3.55894	0.297011	0	0.132215	4.0115	7.57044	0	0.148199	0	5	0.443543	0.500016	0	2.64963	7.64963	14.7128	0	0.0420409	2.86562e-05	0.924441	0	0.058453	0.000674987	0.000703643	96.6878	13.3122	0	0.605101	0.885989	0.607149	0	2.03313	2.63823	20.089
8	CASAN	0.3974	0	0.0179839	0.236994	0.0947167	0	0.0333878	2.72203	2.95903	3.36219	0.570189	0	0.00144999	0.12332	0.0414755	0	0.00251679	0.00396677	0.101117	0.0470821	0	1.58847	0.835413	0.108147	0	0.573078	2.16155	11.6699	3.00086	0	1.02273	0.435321	0.430667	0	2.48656	3.5093	184.371	0	74.3715	0.00676104	0.803199	0.68994	0	2.31037	2.31713	10.951
9	CEDAE	0.3055	0.0739161	0	0.00194815	0.141566	0	0.0802369	6.54152	6.54347	4.24659	0	0.314206	0.399512	0.16037	0.0044257	0	0.000268557	0.39978	0.109904	0.0382953	0	1.29202	0.92438	0.0191792	0	0.101632	1.39365	5.43322	9.23755	0	3.14828	0.217537	0.648451	0	3.744	6.89228	203.553	0	93.5531	0.00850483	1.00626	0.48688	0	1.63039	1.6389	16.8681
10	CESAN	0.3301	0.0493161	0	0.00129979	0.106498	0	0.0451687	3.68249	3.68379	3.12618	0.806201	0	0.00205016	0.0977357	0.0670599	0	0.00406928	0.00611944	0.11315	0.0350495	0	1.18251	0.532491	0.411069	0	2.17829	3.3608	5.92522	8.74555	0	2.9806	0.343787	0.522201	0	3.01506	5.99566	246.68	0	136.68	0.0124254	0.785268	0.707871	0	2.37041	2.38284	15.4292
11	COMPESA	0.5189	0	0.139484	1.83814	0.0816669	0	0.020338	1.65811	3.49625	4.07426	0	0.141875	0.180393	0.225207	0	0.0604111	1.83291	2.0133	0.0830565	0.065143	0	2.19781	0.520037	0.423523	0	2.24428	4.4421	8.29004	6.38073	0	2.17464	0.391848	0.474139	0	2.73756	4.9122	134.493	0	24.4928	0.00222661	0.836464	0.656675	0	2.19898	2.2012	17.0651
12	COPASA	0.3364	0.0430161	0	0.00113375	0.0768847	0	0.0155558	1.26823	1.26936	4.53935	0	0.60697	0.77176	0.164627	0.000168091	0	1.02e-05	0.77177	0.081567	0.0666324	0	2.24807	0.71861	0.224949	0	1.19202	3.44009	11.0956	3.5752	0	1.21848	0.371186	0.494801	0	2.85686	4.07534	151.924	0	41.9245	0.00381132	0.538381	0.954758	0	3.19715	3.20096	12.7575
13	CORSAN	0.3147	0.0647161	0	0.00170568	0.0841838	0	0.022855	1.86331	1.86502	4.82499	0	0.89261	1.13495	0.170709	0	0.00591312	0.179408	1.31436	0.20805	0	0.0598507	0.00403853	1.50011	0	0.556551	0.00589842	0.00993695	17.1276	0	2.45687	0.00167467	0.457958	0.40803	0	2.35586	2.35754	135.748	0	25.7479	0.00234072	0.911062	0.582077	0	1.94917	1.95151	7.49836
14	COSANPA	0.459	0	0.0795839	1.04877	0.0392978	0.0220311	0	0.00359229	1.05236	3.68133	0.25105	0	0.000638417	0.269012	0	0.104217	3.162	3.16263	0.231556	0	0.0833569	0.00562464	0.270015	0.673544	0	3.56917	3.57479	13.1427	1.52806	0	0.520783	1.34329	0	0.477303	0.00551166	0.526295	122.018	0	12.0177	0.00109252	0.0719238	1.42121	0	4.75915	4.76024	13.0763
15	DESO	0.6083	0	0.228884	3.01626	0.122141	0	0.0608117	4.95784	7.9741	3.90978	0.0226006	0	5.7473e-05	0.313326	0	0.14853	4.5065	4.50655	-0.0456429	0.193842	0	6.53991	0.624921	0.318639	0	1.68849	8.22841	12.7575	1.91332	0	0.652086	0.677381	0.188607	0	1.08897	1.74106	143.556	0	33.5557	0.00305052	1	0.493138	0	1.65135	1.6544	24.1045
16	EMBASA	0.4042	0	0.0247839	0.326606	0.0742899	0	0.012961	1.05668	1.38329	4.21932	0	0.286939	0.364842	0.177954	0	0.0131585	0.399237	0.764078	0.0257269	0.122473	0	4.13202	0.608792	0.334767	0	1.77396	5.90598	6.55965	8.11113	0	2.76438	0.346388	0.5196	0	3.00004	5.76442	135.292	0	25.2922	0.00229929	0.954862	0.538277	0	1.8025	1.8048	15.6226
17	MA	0.4928	0	0.113384	1.49419	0.108211	0	0.0468817	3.82215	5.31634	5.23407	0	1.30168	1.65508	0.318046	0	0.15325	4.64971	6.30479	0.120646	0.0275539	0	0.929622	0.9864	0	0.0428404	0.00045403	0.930076	9.53267	5.13811	0	1.75114	0.186543	0.679445	0	3.92295	5.67409	105.274	4.7263	0	0.214832	3.24222	0	1.74908	0.0117141	0.226546	18.4518
18	SABESP	0.314	0.0654161	0	0.00172413	0.107514	0	0.0461856	3.7654	3.76712	3.37784	0.55454	0	0.00141019	0.130214	0.0345812	0	0.00209843	0.00350862	0.0722844	0.075915	0	2.56124	0.518637	0.424923	0	2.2517	4.81294	4.07441	10.5964	0	3.61139	0.327727	0.538261	0	3.10779	6.71917	216.294	0	106.294	0.00966312	0.547306	0.945833	0	3.16726	3.17693	18.4797
19	SANEAGO	0.2862	0.0932161	0	0.00245683	0.0698094	0	0.00848053	0.691398	0.693855	4.33166	0	0.399274	0.507675	0.162063	0.00273212	0	0.000165789	0.507841	-0.0372827	0.185482	0	6.25786	0.809621	0.133938	0	0.70975	6.96761	12.3892	2.28155	0	0.777583	0.491999	0.373988	0	2.15932	2.9369	140.807	0	30.8074	0.00280068	0.903837	0.589302	0	1.97337	1.97617	13.0824
20	SANEPAR	0.3251	0.0543161	0	0.00143157	0.0829292	0	0.0216003	1.76102	1.76245	3.58762	0.344764	0	0.000876732	0.144157	0.0206386	0	0.00125238	0.00212911	0.126413	0.0217865	0	0.735039	0.588197	0.355362	0	1.88309	2.61813	7.63967	7.0311	0	2.3963	0.418866	0.447121	0	2.58157	4.97786	168.141	0	58.1415	0.00528559	0.84262	0.650518	0	2.17836	2.18364	11.5442
	Higher value K(i)	0.271				0.0392978					3.12618				0.0975756					-0.196922				0.270015					4.07441				0.186543					96.6878				0.0719238
	Lower value Ki)	0.622				0.141566					6.7314				0.318046					0.231556				1.50011					17.4677				1.34329					246.68				3.24222
	For positive indicators or negative indicators	0.379416	0.379416	0.379416		0.0613289	0.0613289	0.0613289			3.93238	3.93238	3.93238		0.164796	0.164796	0.164796			0.148199	0.148199	0.148199		0.943559	0.943559	0.943559			14.6708	14.6708	14.6708		0.865988	0.865988	0.865988			192.216	110	110		1.49314	1.49314	1.49314
	Goal value of indicator	0				0					0				0					0			Meta	0					0				0					110				0
	Goal value selected	0.379416				0.0613289					3.93238				0.164796					0.148199			Meta seleccionada	0.943559					14.6708				0.865988					110				1.49314
	Weight of indicator		100	0.2			100	0.2	Weight of Sector 1	1		100	0.2			100	0.2	Weight of Sector 2	1		0.2	100			0.2	100	Weight of Sector 3	1		0.2	100			0.2	100	Weight of Sector 4	1		0.2	100			0.2	100	Weight of Sector 5	1
	Desired address	Minimizar				Minimizar					Minimizar				Minimizar					Maximizar				Maximizar					Maximizar				Maximizar					Maximizar				Maximizar

## Sheet: Visualization
																Item	WWT Companies	Cantidad	ENVIRONMENT AS PROVIDER ( Sector 1)					ENVIRONMENT AS RECEIVER (Sector 2)					PRODUCTION SYSTEM (Sector 3)					SOCIETY AS PROVIDER (Sector 4)					SOCIETY AS RECEIVER (Sector 5)					∑(IPM)	∑( 5 Sectores)	Sustainability
																			Ind. K11	IPM (K11)	Ind. K12	IPM (K12)	∑(Ind. Sector 1)	Ind. K21	IPM (K21)	Ind. K22	IPM (K22))	∑(Ind. Sector 2)	Ind. K31	IPM (K31)	Ind. K32	IPM (K32)	∑(Ind. Sector 3)	Ind. K41	IPM (K41)	Ind. K42	IPM (K42)	∑(Ind. Sector 4)	Ind. K51	IPM (K51)	Ind. K52	IPM (K52)	∑(Ind. Sector 5)			intervals	Company ordered	WWT Company ordered	Sector 1
																1	CORSAN	1	0.3147	0.00170568	0.0841838	1.86331	1.86502	4.82499	1.13495	0.170709	0.179408	1.31436	0.20805	0.00403853	1.50011	0.00589842	0.00993695	17.1276	0.00167467	0.457958	2.35586	2.35754	135.748	0.00234072	0.911062	1.94917	1.95151	7.49836	7.49836	High	CORSAN	1	8
																2	CASAN	2	0.3974	0.236994	0.0947167	2.72203	2.95903	3.36219	0.00144999	0.12332	0.00251679	0.00396677	0.101117	1.58847	0.835413	0.573078	2.16155	11.6699	1.02273	0.435321	2.48656	3.5093	184.371	0.00676104	0.803199	2.31037	2.31713	10.951	10.951	High	CASAN	2	11
																3	SANEPAR	3	0.3251	0.00143157	0.0829292	1.76102	1.76245	3.58762	0.000876732	0.144157	0.00125238	0.00212911	0.126413	0.735039	0.588197	1.88309	2.61813	7.63967	2.3963	0.418866	2.58157	4.97786	168.141	0.00528559	0.84262	2.17836	2.18364	11.5442	11.5442	High	SANEPAR	3	7
																4	COPASA	4	0.3364	0.00113375	0.0768847	1.26823	1.26936	4.53935	0.77176	0.164627	1.02e-05	0.77177	0.081567	2.24807	0.71861	1.19202	3.44009	11.0956	1.21848	0.371186	2.85686	4.07534	151.924	0.00381132	0.538381	3.19715	3.20096	12.7575	12.7575	Medium	COPASA	4	4
																5	COSANPA	5	0.459	1.04877	0.0392978	0.00359229	1.05236	3.68133	0.000638417	0.269012	3.162	3.16263	0.231556	0.00562464	0.270015	3.56917	3.57479	13.1427	0.520783	1.34329	0.00551166	0.526295	122.018	0.00109252	0.0719238	4.75915	4.76024	13.0763	13.0763	Medium	COSANPA	5	3
																6	SANEAGO	6	0.2862	0.00245683	0.0698094	0.691398	0.693855	4.33166	0.507675	0.162063	0.000165789	0.507841	-0.0372827	6.25786	0.809621	0.70975	6.96761	12.3892	0.777583	0.491999	2.15932	2.9369	140.807	0.00280068	0.903837	1.97337	1.97617	13.0824	13.0824	Medium	SANEAGO	6	1
																7	CAGEPA	7	0.3875	0.106531	0.0807158	1.58057	1.6871	4.30918	0.479098	0.209884	1.36801	1.84711	-0.0170717	5.57597	0.65557	1.52608	7.10205	17.4677	0.00190645	0.662399	1.17547	1.17738	130.009	0.00181896	1.08022	1.38271	1.38453	13.1982	13.1982	Medium	CAGEPA	7	6
																8	CAESB	8	0.271	0.00285745	0.0911566	2.43178	2.43464	3.32777	0.00153753	0.171313	0.197747	0.199285	0.00825355	4.72154	0.934464	0.0481995	4.76974	7.54205	2.42957	0.610376	1.47584	3.90541	184.416	0.00676512	0.819873	2.25453	2.26129	13.5704	13.5704	Medium	CAESB	8	10
																9	CESAN	9	0.3301	0.00129979	0.106498	3.68249	3.68379	3.12618	0.00205016	0.0977357	0.00406928	0.00611944	0.11315	1.18251	0.532491	2.17829	3.3608	5.92522	2.9806	0.343787	3.01506	5.99566	246.68	0.0124254	0.785268	2.37041	2.38284	15.4292	15.4292	Medium	CESAN	9	13
																10	EMBASA	10	0.4042	0.326606	0.0742899	1.05668	1.38329	4.21932	0.364842	0.177954	0.399237	0.764078	0.0257269	4.13202	0.608792	1.77396	5.90598	6.55965	2.76438	0.346388	3.00004	5.76442	135.292	0.00229929	0.954862	1.8025	1.8048	15.6226	15.6226	Medium	EMBASA	10	5
																11	CEDAE	11	0.3055	0.00194815	0.141566	6.54152	6.54347	4.24659	0.399512	0.16037	0.000268557	0.39978	0.109904	1.29202	0.92438	0.101632	1.39365	5.43322	3.14828	0.217537	3.744	6.89228	203.553	0.00850483	1.00626	1.63039	1.6389	16.8681	16.8681	Medium	CEDAE	11	19
																12	COMPESA	12	0.5189	1.83814	0.0816669	1.65811	3.49625	4.07426	0.180393	0.225207	1.83291	2.0133	0.0830565	2.19781	0.520037	2.24428	4.4421	8.29004	2.17464	0.391848	2.73756	4.9122	134.493	0.00222661	0.836464	2.19898	2.2012	17.0651	17.0651	Medium	COMPESA	12	12
																13	MA	13	0.4928	1.49419	0.108211	3.82215	5.31634	5.23407	1.65508	0.318046	4.64971	6.30479	0.120646	0.929622	0.9864	0.00045403	0.930076	9.53267	1.75114	0.186543	3.92295	5.67409	105.274	0.214832	3.24222	0.0117141	0.226546	18.4518	18.4518	Medium	MA	13	17
																14	SABESP	14	0.314	0.00172413	0.107514	3.7654	3.76712	3.37784	0.00141019	0.130214	0.00209843	0.00350862	0.0722844	2.56124	0.518637	2.2517	4.81294	4.07441	3.61139	0.327727	3.10779	6.71917	216.294	0.00966312	0.547306	3.16726	3.17693	18.4797	18.4797	Medium	SABESP	14	14
																15	CAERN	15	0.5582	2.35604	0.0963038	2.85142	5.20746	4.39183	0.584186	0.238249	2.22862	2.81281	0.00895926	4.69773	0.602381	1.80793	6.50566	13.8369	0.284185	0.471586	2.27718	2.56137	136.986	0.00245327	0.62159	2.91851	2.92097	20.0083	20.0083	Medium	CAERN	15	15
	TRUE	TRUE														16	CASAL	16	0.448	0.903808	0.0775952	1.32615	2.22996	6.7314	3.55894	0.297011	4.0115	7.57044	0	5	0.443543	2.64963	7.64963	14.7128	2.86562e-05	0.924441	0.000674987	0.000703643	96.6878	0.605101	0.885989	2.03313	2.63823	20.089	20.089	Medium	CASAL	16	9
	TRUE	TRUE														17	CAEMA	17	0.622	3.19681	0.0943581	2.69279	5.8896	3.74011	0.000488954	0.227693	1.90834	1.90883	-0.0462138	6.55918	0.458681	2.56941	9.12859	15.4257	0.000514567	0.974247	0.00125013	0.0017647	125.343	0.00139483	0.381852	3.72131	3.7227	20.6515	20.6515	Medium	CAEMA	17	18
	TRUE	TRUE														18	AGESPISA	18	0.5172	1.81574	0.103124	3.40749	5.22322	3.91863	3.49593e-05	0.158597	0.000376138	0.000411098	-0.177351	10.9835	0.4249	2.74842	13.7319	11.492	1.08339	1.10551	0.00276587	1.08615	159.731	0.00452099	0.714802	2.60638	2.6109	22.6526	22.6526	Low	AGESPISA	18	16
	TRUE	TRUE														19	CAGECE	19	0.4241	0.588851	0.0660336	0.383565	0.972416	4.04901	0.148295	0.0975756	0.00407899	0.152374	-0.196922	11.6438	0.436769	2.68553	14.3293	4.61328	3.42773	0.433486	2.49716	5.92489	169.589	0.00541721	0.862406	2.1121	2.11752	23.4965	23.4965	Low	CAGECE	19	2
	TRUE	TRUE														20	DESO	20	0.6083	3.01626	0.122141	4.95784	7.9741	3.90978	5.7473e-05	0.313326	4.5065	4.50655	-0.0456429	6.53991	0.624921	1.68849	8.22841	12.7575	0.652086	0.677381	1.08897	1.74106	143.556	0.00305052	1	1.65135	1.6544	24.1045	24.1045	Low	DESO	20	20
	TRUE	TRUE																					3.27054					1.7126					5.55315				1.08897	3.53699		1.26578		1.65135	2.35657		16.4299
	TRUE	TRUE																					5.38511					3.90255					9.38365				0.00125013	5.81531		1.73953		3.72131	3.2946		4.53254
	TRUE	TRUE																																			2.49716								7.49836
	TRUE	TRUE																																			3.92295
	TRUE	TRUE
	TRUE	TRUE
	TRUE	TRUE
	TRUE	TRUE
	TRUE	TRUE
	TRUE	TRUE
	TRUE	FALSE
	FALSE
	TRUE	FALSE		20
	FALSE	FALSE
	FALSE	FALSE
	FALSE
[truncated: 10 more columns]
